# Supplementary material for: Presynaptic inhibition of dopamine neurons controls optimistic bias
Source: eLife. 2021 Jun 1;10:e64907. doi: 10.7554/eLife.64907 (PMC8169112; doi:10.7554/eLife.64907)
Supplement: Figure 1—figure supplement 1—source data 2. [file elife-64907-fig1-figsupp1-data2.xlsx]

## Sheet: Sheet1
			Group code	1	2	3
			Genotype	R58E02-GAL4/+	R58E02-GAL4/UAS-GABA-B-R3-RNAi	UAS-GABA-B-R3-RNAi/+
				0.223982	0.336384	0.286638
				0.577586	0.493177	0.205069
				0.1	0.581522	0.0859729
				0.524064	0.441558	0.151515
				0.357143	0.65	0.245357
				0.345238	0.243056	0.443182
				0.15942	0.357143	0.41958
				0.393939	0.569231	0.5
				0.236842	0.607143	0.221429
				0.200893	0.72619	0.493506
				0.393145	0.507937	0.268398
				0.20802		0.291429
