# Supplementary material for: Presynaptic inhibition of dopamine neurons controls optimistic bias
Source: eLife. 2021 Jun 1;10:e64907. doi: 10.7554/eLife.64907 (PMC8169112; doi:10.7554/eLife.64907)
Supplement: Figure 1—source data 1. [file elife-64907-fig1-data1.xlsx]

## Sheet: Sheet1
	Group code	1	2	3	4	5	6	7
	Genotype	CS	R58E02-GAL4/UAS-Grd-RNAi	R58E02-GAL4/UAS-Lcch3-RNAi	R58E02-GAL4/UAS-Rdl-RNAi	R58E02-GAL4/UAS-GABA-B-R1-RNAi	R58E02-GAL4/UAS-GABA-B-R2-RNAi	R58E02-GAL4/UAS-GABA-B-R3-RNAi
		0.561404	0.619444	0.382609	0.192908	0.32619	0.424107	0.622069
		0.49734	0.292484	0.140476	0.413194	0.247619	0.409357	0.6
		0.51	0.0208333	0.436853	0.630719	0.137255	0.42185	0.47619
		0.247845	0.577586	0.644231	0.698529	0.613966	0.305455	0.604762
		0.228571	0.375817	0.396739	0.103679	0.386364	0.0814815	0.432225
		0.140351	0.244032	0.301587	0.503344	0.129412	0.272656	0.421053
		0.473333	0.407143	0.636364	0.513825	0.350575	0.354113	0.576087
		0.413636	0.642036	0.694805	0.230769	0.350877	0.369231	0.56266
		0.398039
		0.618952
		0.372549
		0.272446
		0.374737
		0.297203
		0.366667
		0.559772
		0.515152
		0.466165
		0.463235
		0.276786
		0.408654
		0.306667
		0.244987
