# Supplementary material for: Presynaptic inhibition of dopamine neurons controls optimistic bias
Source: eLife. 2021 Jun 1;10:e64907. doi: 10.7554/eLife.64907 (PMC8169112; doi:10.7554/eLife.64907)
Supplement: Figure 1—source data 3. [file elife-64907-fig1-data3.xlsx]

## Sheet: Sheet1
		Group code	1	2	3		1	2	3		1	2	3		1	2	3
		Training (s)	10	10	10		20	20	20		60	60	60		120	120	120
		Genotype	R58E02-GAL4/+	R58E02-GAL4/UAS-GABA-B-R3-RNAi	UAS-GABA-B-R3-RNAi/+		R58E02-GAL4/+	R58E02-GAL4/UAS-GABA-B-R3-RNAi	UAS-GABA-B-R3-RNAi/+		R58E02-GAL4/+	R58E02-GAL4/UAS-GABA-B-R3-RNAi	UAS-GABA-B-R3-RNAi/+		R58E02-GAL4/+	R58E02-GAL4/UAS-GABA-B-R3-RNAi	UAS-GABA-B-R3-RNAi/+
			-0.0381579	0.175812	0.181741		0.361111	0.33208	0.387234		0.258152	0.394958	0.213397		0.277952	0.697959	0.494152
			0.131707	0.22549	0.0714286		0.485258	0.44883	0.206593		0.390293	0.476098	0.505929		0.524306	0.690476	0.875
			0.0459433	0.358333	0.211285		0.450216	0.479461	0.403252		0.0161031	0.458333	0.00187617		0.74552	0.454902	0.327082
			0.0961538	0.27663	0.280538		0.32066	0.421552	0.297727		0.382353	0.341996	0.433835		0.436293	0.510256	0.284734
			0.0609524	-0.0147826	-0.00294118		0.238831	0.25	0.0403727		0.464286	0.462069	0.451836		0.389744	0.748316	0.461538
			0.118534	0.0561224	0.151786		0.247458	0.38137	0.171178		0.39819	0.758454	0.292717		0.454143	0.79021	0.497674
			-0.118681	0.0693277	0.122222		0.18804	0.325015	0.32254		0.378788	0.57661	0.345833		0.352432	0.54	0.508571
			0.16903	0.2	0.014881		0.188393	0.109091	0.164577		0.281818	0.332819	0.221873		0.516667	0.450844	0.489583
			-0.166667	0.0420584	0.122807		0.231111	0.249428	0.123302		0.366667	0.852941	0.502041		0.41092	0.671108	0.470872
			0.336307	-0.0201161	0.201705		0.228954	0.264151	0.203018		0.539108	0.620536	0.322511		0.410256	0.62	0.294069
			0.0975177	0.113983	0.359756		0.356061	0.290448	0.245763		0.234848	0.471667	0.466151		0.25303	0.503657	0.108974
			0.0666667	-0.00992063	0.0196581		0.274468	0.441138	0.2778		0.632997	0.76	0.557692		0.483104	0.596429	0.461161
