# Supplementary material for: Presynaptic inhibition of dopamine neurons controls optimistic bias
Source: eLife. 2021 Jun 1;10:e64907. doi: 10.7554/eLife.64907 (PMC8169112; doi:10.7554/eLife.64907)
Supplement: Figure 1—source data 4. [file elife-64907-fig1-data4.xlsx]

## Sheet: Sheet1
			Group code	1	1	2	2
			compartment	γ5	α1	γ5	α1
			Genotype	R15A04/UAS-GCaMP6s	R15A04/UAS-GCaMP6s	R15A04/UAS-GCaMP6s UAS-GABA-B-R3-RNAi	R15A04/UAS-GCaMP6s UAS-GABA-B-R3-RNAi
				255.495	367.978	434.402	596.164
				263.275	404.512	420.828	500.569
				207.484	224.665	362.974	314.625
				296.529	211.378	264.187	591.19
				222.106	587.947	240.475	492.207
				297.576	325.375	357.019	386.598
				138.185	154.368	307.852	415.465
						433.317	318.924
