# Supplementary material for: Presynaptic inhibition of dopamine neurons controls optimistic bias
Source: eLife. 2021 Jun 1;10:e64907. doi: 10.7554/eLife.64907 (PMC8169112; doi:10.7554/eLife.64907)
Supplement: Figure 2—source data 1. [file elife-64907-fig2-data1.xlsx]

## Sheet: Sheet1
		Group code	1	2	3	4	5
		Genotype	UAS-VGAT-RNAi/+	VT43924-GAL4/UAS-VGAT-RNAi	UAS-Gad1-RNAi/+	VT43924-GAL4/UAS-Gad1-RNAi	VT43924-GAL4/+
			0.252444	0.309524	0.218288	0.540385	0.252888
			0.252381	0.559846	0.299858	0.652211	0.487558
			0.0521783	0.436853	0.239018	0.615385	0.485377
			0.347712	0.700855	0.508668	0.309524	0.391892
			0.241457	0.552707	0.399767	0.573529	0.174794
			0.142391	0.627135	0.464286	0.318182	0.423445
			0.41507	0.35	0.371517	0.285714	0.145455
			0.28549	0.359477	0.0555267	0.33288	0.0600255
			0.173601	0.42	0.208791	0.5	0.238889
			0.411318	0.652778	0.224223	0.375	0.283333
			0.438636	0.571429	0.163121	0.607843	0.5
				0.5	0.153799	0.698182
					0.221719
