# Supplementary material for: Presynaptic inhibition of dopamine neurons controls optimistic bias
Source: eLife. 2021 Jun 1;10:e64907. doi: 10.7554/eLife.64907 (PMC8169112; doi:10.7554/eLife.64907)
Supplement: Figure 2—source data 2. [file elife-64907-fig2-data2.xlsx]

## Sheet: Sheet1
			Group code	1	2	1	2
			position	axon terminal	axon terminal	dendrite	dendrite
			Genotype	R15A04-GAL4/UAS-GCaMP6s	R15A04-GAL4/UAS-GCaMP6s, UAS-GABA-B-R3-RNAi	R15A04-GAL4/UAS-GCaMP6s	R15A04-GAL4/UAS-GCaMP6s, UAS-GABA-B-R3-RNAi
				137.528	200.359	63.775	106.482
				127.041	353.458	98.026	149.338
				113.626	432.475	74.89	139.516
				183.059	273.497	90.303	122.533
				211.775	256.534	154.829	113.34
				138.185	357.019	173.506	168.215
					249.852		88.668
