# Supplementary material for: Presynaptic inhibition of dopamine neurons controls optimistic bias
Source: eLife. 2021 Jun 1;10:e64907. doi: 10.7554/eLife.64907 (PMC8169112; doi:10.7554/eLife.64907)
Supplement: Figure 3—figure supplement 1—source data 1. [file elife-64907-fig3-figsupp1-data1.xlsx]

## Sheet: Sheet1
				Group code	1	2
				Genotype	R15A04-GAL4/UAS-GCaMP6s.brpS.mCherry	R15A04-GAL4/UAS-GCaMP6s.brpS.mCherry, UAS-GABA-B-R3-RNAi
					0.530418	1.0315
					0.67087	1.17658
					0.510281	1.12166
					0.988291	1.20293
					1.14752	1.07942
					1.07404	1.1457
					1.16661	1.22269
					1.21017	1.30691
					0.41806	1.27219
					0.664724	1.15829
					0.863372	1.17413
					0.650157
					1.19722
					1.28375
					1.0984
					1.43531
