# Supplementary material for: Presynaptic inhibition of dopamine neurons controls optimistic bias
Source: eLife. 2021 Jun 1;10:e64907. doi: 10.7554/eLife.64907 (PMC8169112; doi:10.7554/eLife.64907)
Supplement: Figure 3—figure supplement 1—source data 2. [file elife-64907-fig3-figsupp1-data2.xlsx]

## Sheet: Sheet1
		Group code	1					2
		Phase	pre-stimulation	pre-stimulation	during-stimulation	during-stimulation		pre-stimulation	pre-stimulation	during-stimulation	during-stimulation
		Genotype	R15A04-GAL4/UAS-GCaMP6s.brpS.mCherry					R15A04-GAL4/UAS-GCaMP6s.brpS.mCherry, UAS-GABA-B-R3-RNAi
			mean	sd	mean	sd		mean	sd	mean	sd
			-0.558443	0.332589	-0.309579	0.336728		-0.907828	1.08919	-0.316499	1.06022
			-0.707966	0.676513	-0.452138	0.647245		-0.839297	1.237	-0.313276	1.06892
			-1.12332	0.916217	-0.588816	0.925689		-0.833187	1.23241	-0.432068	1.04205
			-0.471372	0.673187	-0.103938	0.600601		-1.09193	1.20326	-0.341183	1.14043
			-1.06607	1.1791	-0.369419	0.968125		-1.09158	1.10787	-0.0815671	0.920219
			-0.876432	1.28596	-0.475803	1.20928		-1.23001	1.14679	-0.198953	0.881849
			-0.977638	1.10959	-0.673839	1.02896
			-1.14282	1.4281	-0.52183	1.3213
