# Supplementary material for: Presynaptic inhibition of dopamine neurons controls optimistic bias
Source: eLife. 2021 Jun 1;10:e64907. doi: 10.7554/eLife.64907 (PMC8169112; doi:10.7554/eLife.64907)
Supplement: Figure 3—figure supplement 1—source data 3. [file elife-64907-fig3-figsupp1-data3.xlsx]

## Sheet: Sheet1
					Group code	1	2
					Genotype	R15A04-GAL4/UAS-GCaMP6s.brpS.mCherry	R15A04-GAL4/UAS-GCaMP6s.brpS.mCherry, UAS-GABA-B-R3-RNAi
						1.00466	1.12473
						1.00743	1.08613
						0.989975	1.08718
						1.09725	1.08794
						1.10121	1.1353
						1.06886	1.07438
						1.14178	1.09047
						1.09867	1.16148
						1.02236	1.06338
						1.10971	1.07674
						1.06086	1.16697
						1.09188	1.04367
						1.09683	1.09424
						1.07684	1.12115
						1.06511	1.08798
						1.01275	1.06365
						1.10196	1.13187
						1.07236
						1.11772
						1.09673
						1.09281
						1.0322
