# Supplementary material for: Presynaptic inhibition of dopamine neurons controls optimistic bias
Source: eLife. 2021 Jun 1;10:e64907. doi: 10.7554/eLife.64907 (PMC8169112; doi:10.7554/eLife.64907)
Supplement: Figure 3—source data 1. [file elife-64907-fig3-data1.xlsx]

## Sheet: Sheet1
			Group code	1	2
			Genotype	R15A04-GAL4/UAS-GCaMP6s.brpS.mCherry	R15A04-GAL4/UAS-GCaMP6s.brpS.mCherry, UAS-GABA-B-R3-RNAi
				0.0271228	0.0549935
				0.0389396	0.0411262
				0.0169569	0.0772478
				0.0708951	0.184109
				0.0364233	0.0375182
				0.066051	0.044556
				0.0391024	0.124294
				0.0308173	0.0676321
				0.0404094	0.11816
				0.0809458	0.0537621
				0.14323	0.0758107
				0.0590608	0.0952206
				0.0679801	0.136863
				0.0538483	0.128155
				0.0410161	0.0791876
				0.0406927	0.0997569
				0.0335296	0.0787716
				0.0365218
				0.0323447
				0.0362821
				0.0690996
				0.0769206
				0.03704
				0.0596398
