# Supplementary material for: Presynaptic inhibition of dopamine neurons controls optimistic bias
Source: eLife. 2021 Jun 1;10:e64907. doi: 10.7554/eLife.64907 (PMC8169112; doi:10.7554/eLife.64907)
Supplement: Figure 3—source data 2. [file elife-64907-fig3-data2.xlsx]

## Sheet: Sheet1
		Group code	1					2
		Phase	pre-stimulation	pre-stimulation	during-stimulation	during-stimulation		pre-stimulation	pre-stimulation	during-stimulation	during-stimulation
		Genotype	R15A04-GAL4/UAS-GCaMP6s.brpS.mCherry					R15A04-GAL4/UAS-GCaMP6s.brpS.mCherry, UAS-GABA-B-R3-RNAi
			mean	sd	mean	sd		mean	sd	mean	sd
			-0.615214	0.530418	-0.322903	0.555046		-1.27132	1.0315	-0.62281	0.891287
			-0.714928	0.67087	-0.625353	0.667694		-1.32856	1.17658	-0.622178	1.13761
			-0.281287	0.510281	-0.280357	0.507217		-1.18267	1.12166	-0.447889	0.992334
			-1.3009	0.988291	-1.17772	0.987876		-1.03916	1.20293	-0.815995	1.17948
			-1.24569	1.14752	-1.00158	1.082		-1.15889	1.07942	-0.443327	0.837173
			-1.29494	1.07404	-0.558642	0.972972		-0.622219	1.1457	-0.292956	1.12205
			-1.17484	1.16661	-0.684991	1.04278		-0.799116	1.22269	-0.493114	1.15854
			-1.26326	1.21017	-1.06568	1.22229		-0.669223	1.30691	-0.132964	1.11222
			-0.381547	0.41806	-0.259056	0.392511		-1.01049	1.27219	-0.191415	1.11717
			-0.602548	0.664724	-0.573664	0.674534		-1.02642	1.15829	-0.213566	0.971491
			-0.513874	0.863372	-0.395523	0.88476		-1.08251	1.17413	-0.230429	0.962303
			-0.355215	0.650157	-0.036035	0.587032
			-1.35322	1.19722	-1.24312	1.1782
			-1.24387	1.28375	-0.996682	1.26692
			-1.01797	1.0984	-0.930792	1.07479
			-1.09272	1.43531	-0.78253	1.39279
