# Supplementary material for: Presynaptic inhibition of dopamine neurons controls optimistic bias
Source: eLife. 2021 Jun 1;10:e64907. doi: 10.7554/eLife.64907 (PMC8169112; doi:10.7554/eLife.64907)
Supplement: Figure 4—source data 1. [file elife-64907-fig4-data1.xlsx]

## Sheet: Sheet1
			Group code	1	2	3		1	2	3		1	2	3
			4MCH:2MCH	100:0	100:0	100:0		50:50	50:50	50:50		0:100	0:100	0:100
			Genotype	R58E02-GAL4/+	R58E02-GAL4/UAS-GBR3-RNAi	UAS-GBR3-RNAi/+		R58E02-GAL4/+	R58E02-GAL4/UAS-GBR3-RNAi	UAS-GBR3-RNAi/+		R58E02-GAL4/+	R58E02-GAL4/UAS-GBR3-RNAi	UAS-GBR3-RNAi/+
				0.292041	0.269231	0.338681		0.102326	0.309898	0.335441		0.0806271	-0.0819672	0.0615942
				0.402054	0.286364	0.148863		0.11	0.522078	0.285492		0.0300188	0.129756	0.168333
				0.275	0.540441	0.293645		0.114988	0.375	0.177778		0.14	0.179206	0.301435
				0.174957	0.426923	0.258237		0.207943	0.484444	0.257143		-0.0318182	0.280541	-0.0692308
				0.296194	0.526977	0.169231		0.0996732	0.521337	0.153333		-0.011396	0.0949309	0.193439
				0.302661	0.269841	0.392789		0.55336	0.433333	0.0985222		0.176923	0.276471	0.330317
				0.361486	0.413133	0.281609		0.442568	0.45977	-0.0101868		0.0239301	0.336923	-0.0419103
				0.431078	0.243665	0.190126		0.331254	0.326059	0.263158		0.0611111	0.464286	0.180728
				0.375	0.449811	0.508772		0.125	0.647215	0.111836
				0.292308	0.5	0.289044		0.146739	0.39819	0.225641
				0.37037	0.385093	0.266831			0.398649	0.277778
				0.357143	0.575758	0.386905
				0.416667	0.351515	0.207729
				0.51049	0.572917	0.536181
					0.592593	0.350033
					0.375	0.302987
					0.541667
