# Supplementary material for: Presynaptic inhibition of dopamine neurons controls optimistic bias
Source: eLife. 2021 Jun 1;10:e64907. doi: 10.7554/eLife.64907 (PMC8169112; doi:10.7554/eLife.64907)
Supplement: Figure 4—source data 2. [file elife-64907-fig4-data2.xlsx]

## Sheet: Sheet1
			Group code	1	2	3		1	2	3		1	2	3
			3OCT:1OCT	100:0	100:0	100:0		50:50	50:50	50:50		0:100	0:100	0:100
			Genotype	R58E02-GAL4/+	R58E02-GAL4/UAS-GBR3-RNAi	UAS-GBR3-RNAi/+		R58E02-GAL4/+	R58E02-GAL4/UAS-GBR3-RNAi	UAS-GBR3-RNAi/+		R58E02-GAL4/+	R58E02-GAL4/UAS-GBR3-RNAi	UAS-GBR3-RNAi/+
				0.366667	0.463594	0.106061		0.136879	0.149527	0.0940466		0.258009	0.194332	-0.0123457
				0.142857	0.489766	0.301067		0.0405405	0.0868056	0.0987288		0.129032	0.282648	0.177044
				0.257576	0.477733	0.376766		0.0639456	0.59	0.249206		0.159722	0.3878	0.0548469
				0.402831	0.615179	0.418972		-0.106957	0.65602	0.185897		0.0580848	0.186813	0.160727
				0.0142857	0.138107	0.250774		0.114286	0.195513	0.175408		0.191667	0.0935065	-0.0421885
				0.015873	0.355556	0.334334		0.490598	0.377289	0.109375		0.154882	0.138756	0.229974
				0.43	0.309524	0.190909		0.275362	0.224172	0.0104099		0.00956938	0.166215	-0.144186
				0.147727	0.39835	0.0774194		0.0198864	0.14	0.030888		0.1	0.324786	0.298462
				0.149343	0.389655	0.247059		0.2949	0.29304	-0.149351
				0.357143	0.333333	0.119789		-0.0198864	0.22	0.131119
				0.266899	0.273954	0.176429		0.309524	0.428571	0.14357
				0.286713	0.471154	0.148319		0.355392	0.180952	0.224603
				0.201335	0.27	0.306667		0	0.404858	0.362489
				0.23545	0.403344	0.23739		0.12532	0.283422	0.11412
				0.385294	0.586873	0.190476		0.0699301	0.338433
				0.277778	0.378436	0.415064		0.128959	0.214674
				0.275624	0.119898	0.315789		-0.309524	0.393939
				0.188462	0.363712	0.337945
				0.452128	0.199344	0.26131
				0.320261	0.354167	0.431579
