# Supplementary material for: Presynaptic inhibition of dopamine neurons controls optimistic bias
Source: eLife. 2021 Jun 1;10:e64907. doi: 10.7554/eLife.64907 (PMC8169112; doi:10.7554/eLife.64907)
Supplement: Figure 4—source data 3. [file elife-64907-fig4-data3.xlsx]

## Sheet: Sheet1
			Group code	1	2	3		1	2	3		1	2	3
			4MCH:2MCH	100:0	100:0	100:0		50:50	50:50	50:50		0:100	0:100	0:100
			Genotype	VT43924-GAL4/+	VT43924-GAL4/ UAS-Gad1-RNAi	UAS-Gad1-RNAi/+		VT43924-GAL4/+	VT43924-GAL4/ UAS-Gad1-RNAi	UAS-Gad1-RNAi/+		VT43924-GAL4/+	VT43924-GAL4/UAS-Gad1-RNAi	UAS-Gad1-RNAi/+
				0.28343	0.442645	0.284827		0.164985	0.406152	0.176787		-0.125	-0.0794634	0
				0.380289	0.18256	0.159959		0.214047	0.191919	0.0630054		-0.0176871	0.000516796	0.040497
				0.251701	0.449874	0.233522		0.266106	0.380952	0.18209		0.128448	0.0717949	0.122294
				0.264254	0.282155	0.277067		0.215445	0.319562	0.0503968		0.110638	-0.0298103	0.211924
				0.353147	0.251163	0.357092		0.189303	0.272727	0.00172951		0.162162	-0.0308087	0.213312
				0.239636	0.615686	0.275385		0.145532	0.380952	0.195375		0.160684	0.00689061	-0.157895
				0.358007	0.540816	0.24504		0.0740741	0.415836	0.320455		0.120324	0.222222	0.110119
				0.568182	0.342442	0.208791		0.404762	0.407609	0.214792		-0.0101112	-0.106571	0.0625
				0.335268	0.578987	0.356309		0.0285088	0.346429	0.0941915		0.132445	0.00216372	0.0290598
				0.376766	0.310698	0.340839		0.25	0.477564	0.245161			-0.0848837
				0.214323	0.336905	0.219204		0.307692		0.275
				0.156505	0.407115	0.435085
