# Supplementary material for: Presynaptic inhibition of dopamine neurons controls optimistic bias
Source: eLife. 2021 Jun 1;10:e64907. doi: 10.7554/eLife.64907 (PMC8169112; doi:10.7554/eLife.64907)
Supplement: Figure 4—source data 4. [file elife-64907-fig4-data4.xlsx]

## Sheet: Sheet1
			Group code	1	2	3		1	2	3		1	2	3
			3OCT:1OCT	100:0	100:0	100:0		50:50	50:50	50:50		0:100	0:100	0:100
			Genotype	VT43924-GAL4/+	VT43924-GAL4/UAS-Gad1-RNAi	UAS-Gad1-RNAi/+		VT43924-GAL4/+	VT43924-GAL4/UAS-Gad1-RNAi	UAS-Gad1-RNAi/+		VT43924-GAL4/+	VT43924-GAL4/UAS-Gad1-RNAi	UAS-Gad1-RNAi/+
				0.260684	0.270563	0.297959		0.408201	0.165303	0.0461538		0.22963	0.0357143	0.0976827
				0.388312	0.480753	0.15917		0.189474	0.0904762	0.170053		0.185869	0.181818	0.151884
				0.111111	0.6	0.263975		0.0748299	0.595933	0.0161638		0.0415861	0.39239	-0.0636244
				0.306633	0.589066	0.13961		0.415385	0.765306	0.346096		0.0340426	0.236481	0.0552291
				0.267361	0.385	0.308712		0.0714286	0.341935	-0.114286		-0.0992063	0.126122	0.0127551
				0.0918605	0.402174	0.27381		0.1	0.18538	0.106516		-0.0506934	-0.133817	0.0892857
				0.285714	0.322222	0.179344		0.128571	-0.0183824	0.127907		-0.110672	-0.0765086	0.141026
				0.378299	0.540741	0.333333		0.0196078	0.427778	-0.151116		0.381264	-0.00292398	-0.102273
				0.25	0.0906433	0.119857		-0.0135747	0.183362	0.150484		0.0702614	0.550239	0.00140056
				0.205937	0.271122	0.185455		-0.0148148	0.244369	-0.00952381		-0.113843	0.321563	-0.0366856
				0.420168	0.540698	0.336518		0.0736364	0.515033	0.46734		0.362128	-0.0485714	-0.0729167
				0.257576	0.357813	0.159091		-0.0785773		-0.0444444		0.146853	0.199015	0.324324
